# Supplementary material for: Mannosidase activity of EDEM1 and EDEM2 depends on an unfolded state of their glycoprotein substrates
Source: PubMed Central journal article supplement (PMC6194124; doi:10.1038/s42003-018-0174-8), 2018-10-18
Supplement: 42003_2018_174_MOESM1_ESM.pdf [file 42003_2018_174_MOESM1_ESM.pdf]

## Supplementary Information

### Supplementary figures

Suppl. Fig. 1. Shenkman et al

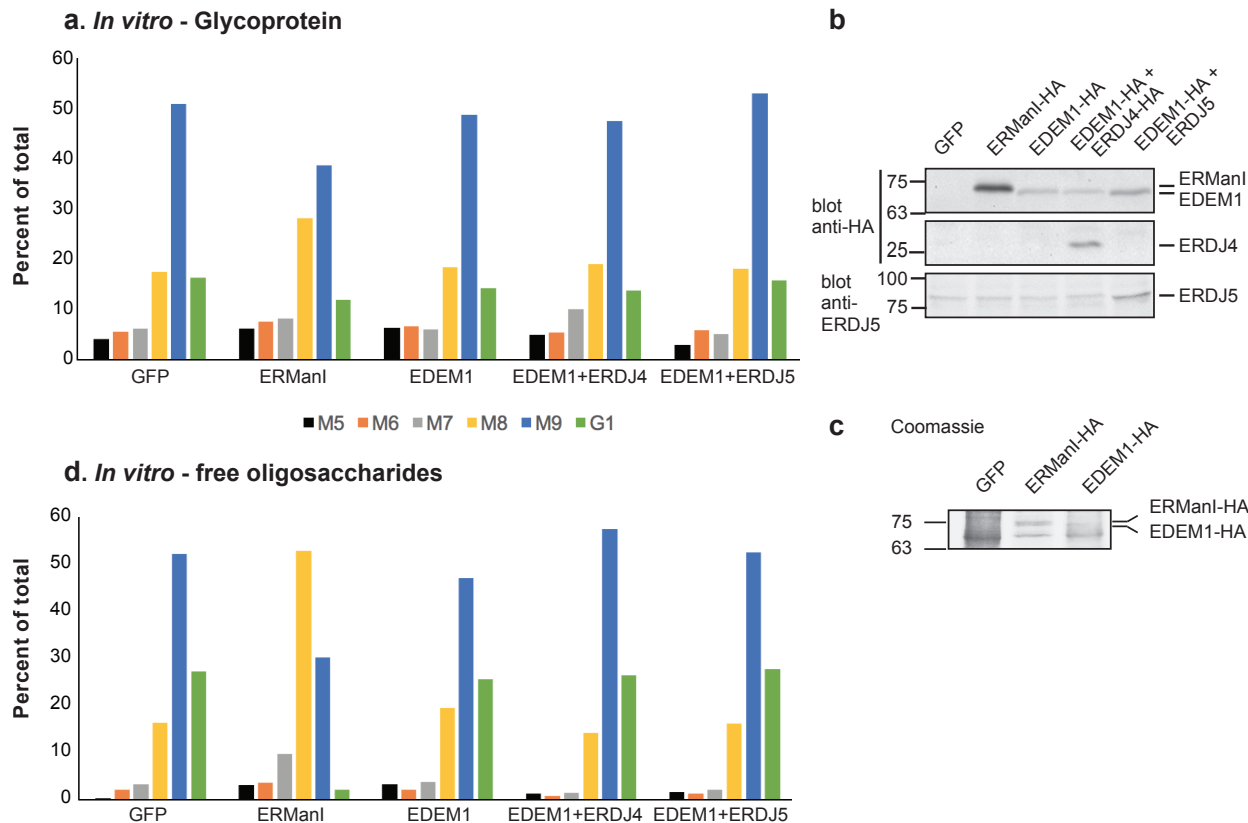

**Suppl. Fig. 1. EDEM1 mannosidase activity *in vitro* is not enhanced by the presence of ERDJ4 or ERDJ5. a)** Similar to Fig. 5a, vitellogenin was treated *in vitro* in this case with ERManI-HA, EDEM1-HA or EDEM1-HA together with ERDJ4-HA or ERDJ5. **b)** Immunoblots of the proteins used in the treatments in (a) with anti-HA or anti-ERDJ5 antibodies (a weak ERDJ5 signal can be observed for the endogenous protein, enhanced upon transfection with exogenous protein). **c)** SDS-PAGE and Coomassie blue staining of ERManI-HA and EDEM1-HA used in (a). **d)** Similar to (a), but using free N-glycans as substrates.

***In vitro* - free oligosaccharides**

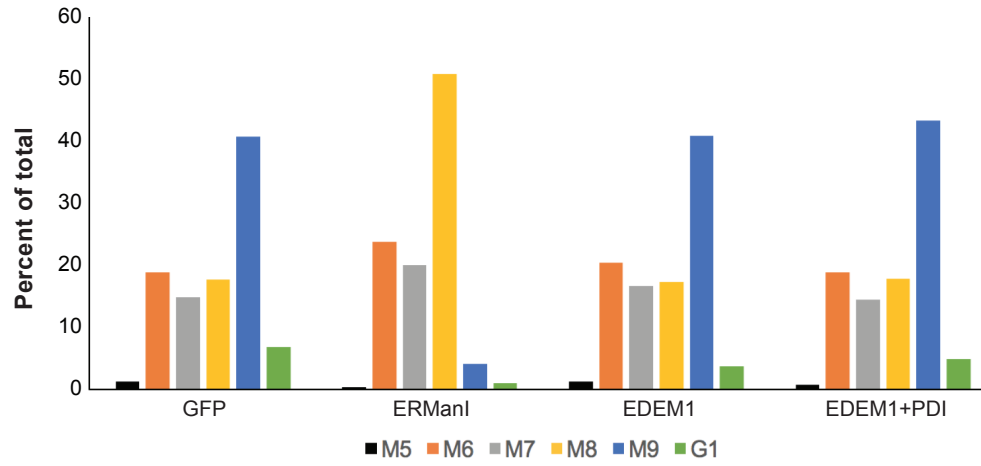

**Suppl. Fig. 2. EDEM1 mannosidase activity on free oligosaccharides *in vitro* is not enhanced by the presence of PDI.** Similar to Suppl. Fig. 1c but with N-glycans treated with EDEM1-HA together with FLAG-PDI.

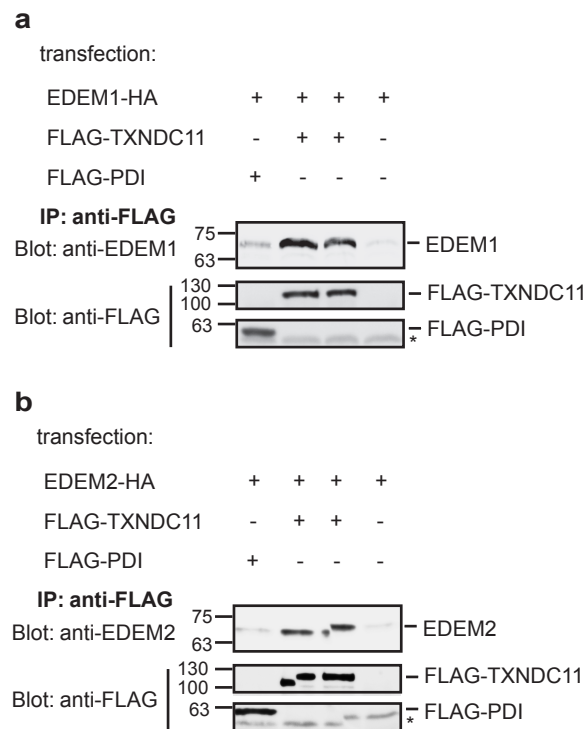

**Suppl. Fig. 3. Coimmunoprecipitation of EDEM1 and EDEM2 with PDI and TXNDC11.** Half of each lysate from Fig. 6a and 6b was immunoprecipitated with anti-FLAG, subjected to SDS-PAGE and immunoblotted with anti-EDEM1 (a) or anti-EDEM2 (b) or anti-FLAG (a,b). Interactions were stronger with TXNDC11 than with PDI. The results shown are representative of 3 repeat experiments.

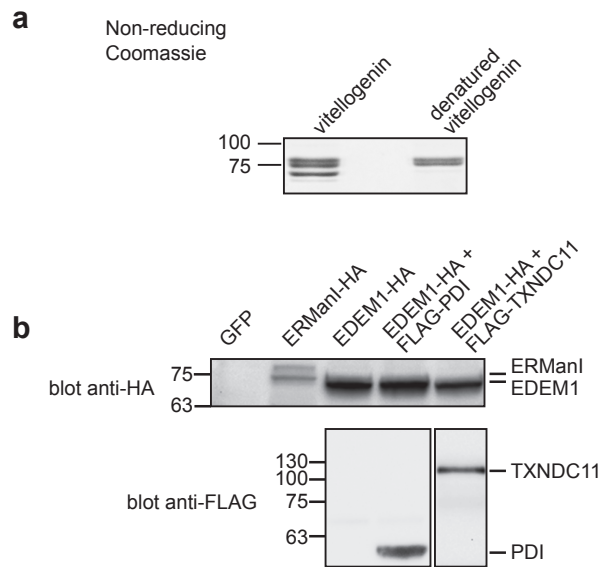

**Suppl. Fig. 4. Proteins used in the treatments in Fig. 5 and 7. a)** Non-reducing SDS-PAGE and Coomassie blue staining of native vitellogenin used in Fig. 5 compared to denatured vitellogenin used in Fig. 7. Faster migration of more compact disulfide-bonded molecules can be seen for the native and not for the reduced, denatured protein. **b)** Immunoblots of proteins used in Fig. 7 a, b with anti-HA or anti-FLAG antibodies. In the case of FLAG-TXNDC11 we immunoprecipitated with anti-FLAG before blotting with anti-FLAG.

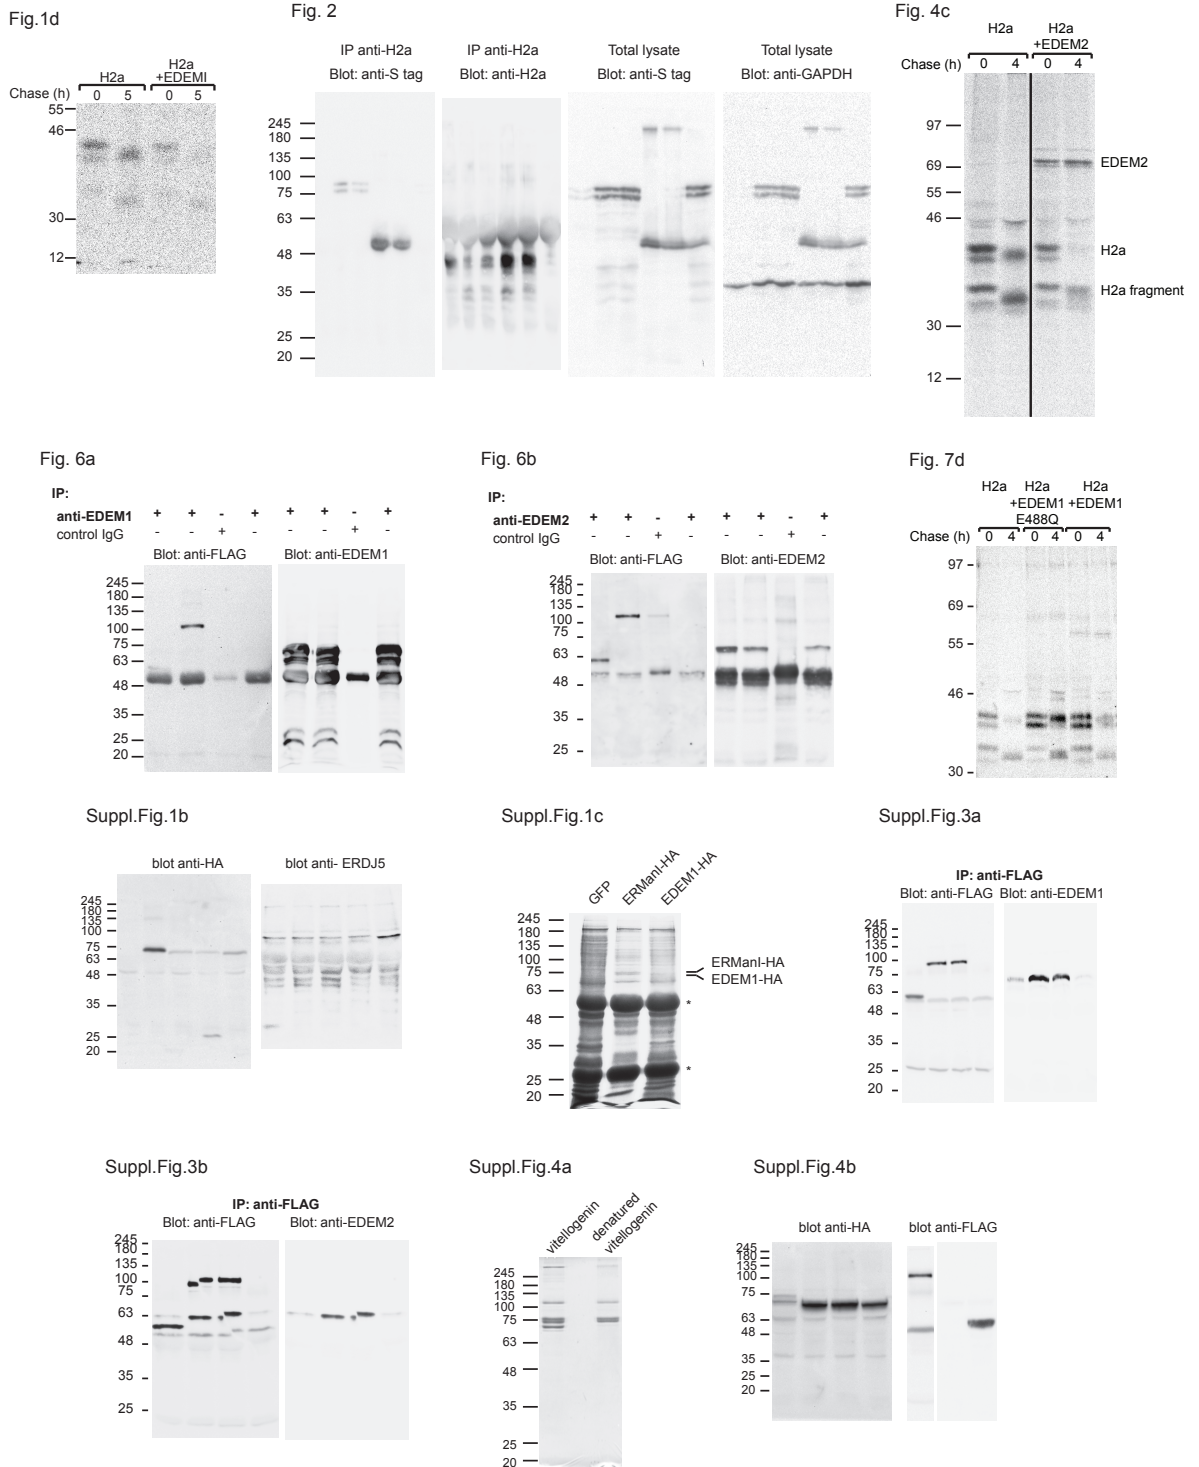

**Suppl. Fig. 5. Full length gels.** Full length gels and blots of all experiments in the indicated figures.

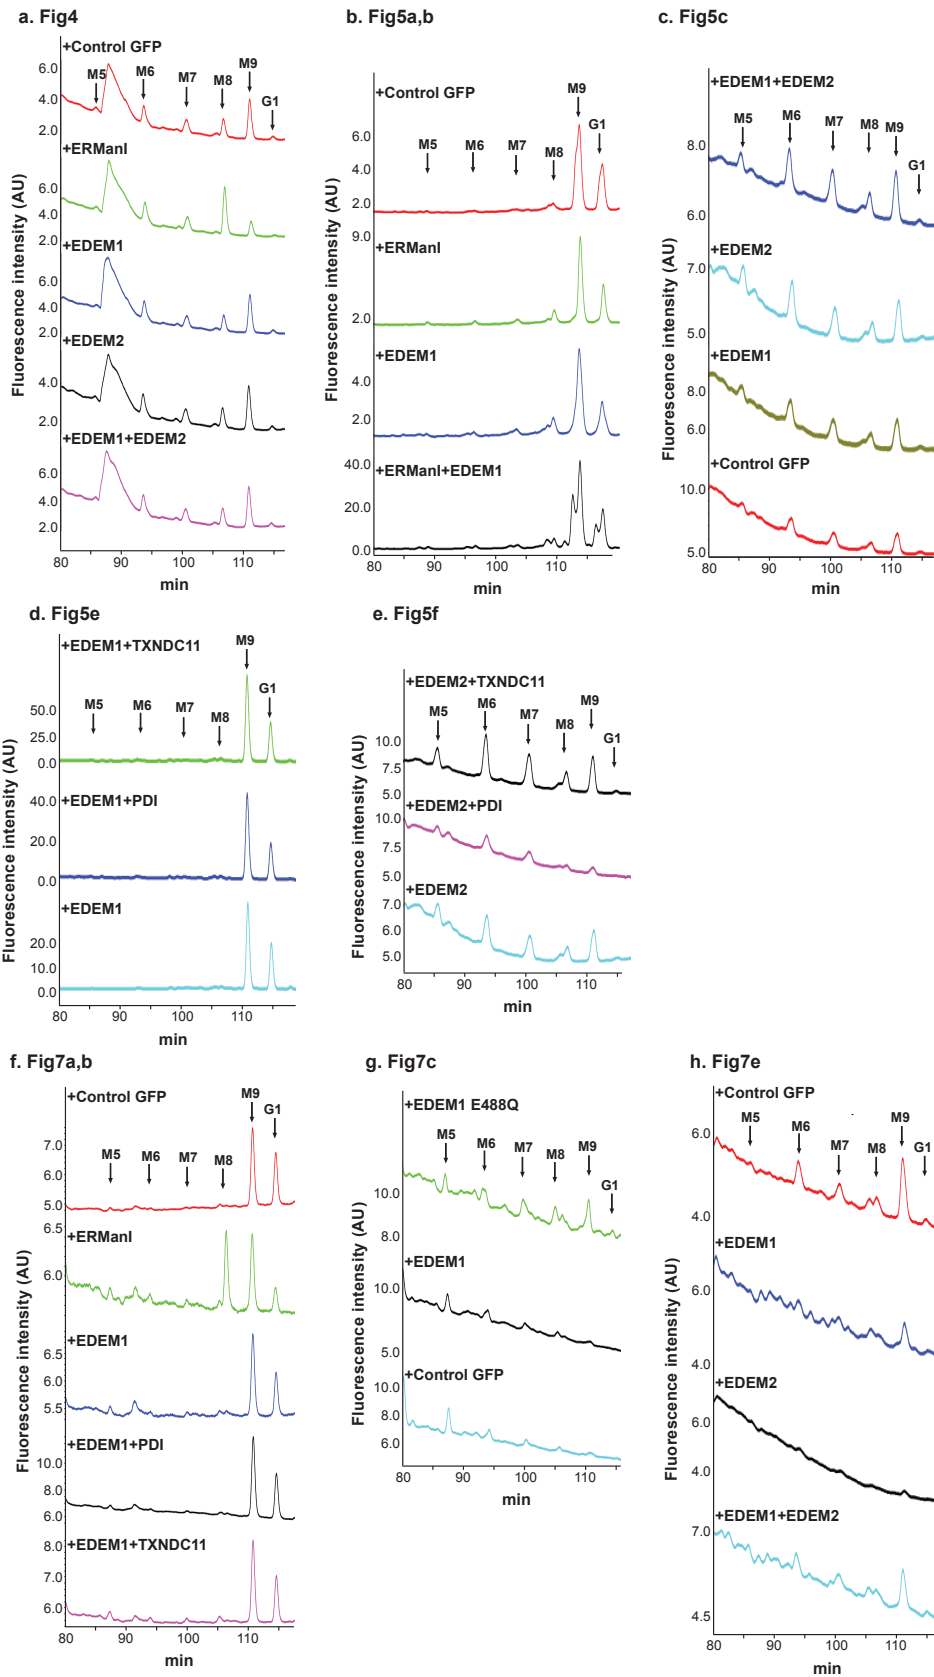

**Suppl. Fig. 6. HPLC Chromatograms.** All chromatograms that were quantitated and used for the graphs in the indicated figures.
